# Supplementary material
Source: PubMed Central journal article supplement (PMC6519699)
Supplement: bhy121_pdooda_suppmaterials_cerebralcortex_response3_v2_4-18-2018.pdf [file bhy121_pdooda_suppmaterials_cerebralcortex_response3_v2_4-18-2018.pdf]

## SUPPLEMENTAL MATERIALS

### Emergent Functional Network Effects in Parkinson Disease

#### Supplemental Methods

##### Participants: Inclusion and Exclusion Criteria

PD was diagnosed based on clinical diagnostic criteria from the modified United Kingdom PD Society Brain Bank, requiring clear motor response to levodopa (Hughes et al., 1992). PD participants were excluded from the study based on: neurologic diagnosis other than PD, head injury with loss of consciousness of > 5 minutes or neurologic sequelae, presence of severe psychiatric disorders (e.g., schizophrenia), treatment with drugs that block or deplete dopaminergic signaling, or inability to complete MRI. Dementia was assessed in all participants by Clinical Dementia Rating (CDR) evaluation (Morris, 1993), with a global score of 0 indicating normal cognition, 0.5 indicating cognitive decline, and  $\geq 1$  indicating dementia. We did not include PD participants if they met criteria for dementia (CDR  $\geq 1$  or a Mini-Mental Status Examination score of < 24; 5 people with PD and dementia were excluded).

HC (age-matched) were recruited through the PD participants (e.g., spouses/partners), with the following additional exclusion criteria: normal neurological examination, no family history of PD, normal cognition (CDR = 0), and no evidence of pre-clinical Alzheimer's disease (Sperling et al., 2011) (based on  $\beta$ -amyloid PIB PET, (Mintun et al., 2006)). Five controls were excluded based on elevated cortical  $\beta$ -amyloid levels.

##### Behavioral Assessments: Detailed Account of Tests

Where relevant, clinical, cognitive, and motor measures were compared between groups using two-sample two-tailed t-tests or chi-squared measures (for differences in sex ratio).

*Cognitive Assessment:* Participants completed tests of memory (California Verbal Learning Test-II, short form (Delis et al., 2000); Logical Memory (Wechsler, 1997b)), attention (Digit Span (Wechsler, 1997a); Digit Symbol (Wechsler, 1997a)), language (Boston Naming Test (Kaplan et al., 2001)), visual-spatial (Judgment of Line Orientation (Lezak, 2004); Spatial Relations Test (Woodcock et al., 2001); Hooper Visual Organization Test (Hooper, 1983)) and executive function (Trail Making Test (Lezak, 1995); Verbal Fluency (Delis et al., 2001); Stroop (Delis et al., 2001)). Age-adjusted scaled scores, based on test manuals and published normative data (Ivnik et al., 1996), were converted to Z-scores, averaged within cognitive domains, then averaged across domains to create a global cognitive Z-score for each participant. PD participants completed the neuropsychological evaluation while OFF medication to minimize the potential confound on performance (Cools, 2006).

*Motor Assessment:* Movement disorder specialists rated motor severity using the Unified Parkinson Disease Rating Scale motor evaluation (UPDRS-III) (Fahn et al., 1987) after overnight withdrawal of PD medications. Motor subscores were computed as previously described (Campbell et al., 2015).

##### Data Preprocessing

FMRI data first underwent a standard set of preprocessing steps (Campbell et al., 2015; Fox et al., 2005; Hacker et al., 2012), which included slice-timing correction, rigid-body motion correction, mode 1000 normalization, affine alignment to the structural MRI scan, and affine alignment to an atlas template, created from equal numbers of PD and HC participants to reduce systematically biased errors in the registration procedure (Buckner et al., 2004; Campbell et al., 2015). Alignments were concatenated and applied as a single transform at the final step.

| #  | Reference                                      | Aim of study                                                 | Dataset Characteristics               |             |                  | Motion |                                |                                                                                                                                                                                                                                  | Scope                                |                |                 |              | Results                                                                                                                            |                                                                                                                                                       | Notes                                                                                                                      |                                                                                                                 |
|----|------------------------------------------------|--------------------------------------------------------------|---------------------------------------|-------------|------------------|--------|--------------------------------|----------------------------------------------------------------------------------------------------------------------------------------------------------------------------------------------------------------------------------|--------------------------------------|----------------|-----------------|--------------|------------------------------------------------------------------------------------------------------------------------------------|-------------------------------------------------------------------------------------------------------------------------------------------------------|----------------------------------------------------------------------------------------------------------------------------|-----------------------------------------------------------------------------------------------------------------|
|    |                                                |                                                              | # subjects                            | on/off meds | Data per subject | GSR    | Censor                         | anything else to address motion?                                                                                                                                                                                                 | within/between network               | Cortex (#nets) | Subcor          | Cereb        | Region/Network definition                                                                                                          | FC: decreases (dec.) in PD                                                                                                                            |                                                                                                                            | FC: increases (inc.) in PD                                                                                      |
| 1  | Baggio 2014 HBM                                | FC and graph theory differences in PD based on MCI status    | 66 PD, 36 HC (PD: MCI=23, non-MCI=43) | ON          | 5 min.           | N      | N                              | 18 PD excluded (>0.3mm translation, 0.6 deg rotation), but motion still differs between groups, include as a covariate                                                                                                           | both                                 | Y (6)          | Y               | N            | AAL                                                                                                                                | dec. widespread within & btwn systems, especially for long distance connections                                                                       | inc. (few) within thalamus and within prefrontal cortex (association systems)                                              | Supp. Fig. 1 is focus here; some differences in graph metrics and between MCI groups                            |
| 2  | Olde-Dubbelink 2014 Neurol                     | FC and cognitive decline in PD over 3 yrs                    | 55 PD, 15 HC                          | ON          | 6 min.           | N      | N                              | 4 PD excluded based on movement artifacts in registration, also looked for motion artifacts with ICA MELODIC                                                                                                                     | both - not separately reported       | Y              | Y               | N            | AAL + First (subcortical)                                                                                                          | dec. whole-brain FC, especially in FP, SM, visual, and temporal                                                                                       | none reported                                                                                                              |                                                                                                                 |
| 3  | Amboni 2015 J Neurol                           | FC with cognitive impairment in PD                           | 42 PD, 20 HC (PD: MCI=21, non-MCI=21) | ON          | 6 min.           | Y      | N                              | report motion did not exceed voxel size, no significant differences between groups                                                                                                                                               | within                               | Y (3)          | Y               | not reported | ICA with focus on DMN, FP, and visual                                                                                              | dec. FC within DMN and FP                                                                                                                             | none reported                                                                                                              | impaired show dec. FC within FP                                                                                 |
| 4  | Baggio 2015 HBM                                | FC and SC in PD with MCI                                     | 65 PD, 36 HC (PD: MCI=22, non-MCI=43) | ON          | 5 min.           | N      | Y - lenient*, DVARs > 75th%ile | 18 PD excluded (>0.3mm translation, 0.6 deg rotation), but motion still differs between groups, include as a covariate                                                                                                           | both                                 | Y (4)          | N               | N            | ICA networks (DAN, DMN, L and R FP) + Spreng seeds                                                                                 | none found                                                                                                                                            | none found                                                                                                                 | differences only seen when separating MCI groups; within DAN                                                    |
| 5  | Campbell 2015 Neurology                        | relationship of CSF proteins to FC in PD                     | 43 PD, 22 HC                          | OFF         | 7-22 min.        | Y      | Y - DVARs > 0.5%               | runs excluded if > 0.6mm RMS or average voxel-wise SD >0.5%; participants with > 15% volumes loss excluded (14 PD, 1 HC)                                                                                                         | within (between shown, not analyzed) | Y (5)          | BG only         | N            | seeds, 5 networks (SM, DAN, DMN, CO, Sal)                                                                                          | dec. FC within SM, also dec. magnitude FC in the caudate in seed-based analyses                                                                       | inc. FC within DMN                                                                                                         | subset of our current dataset, less stringent motion criteria                                                   |
| 6  | Canu 2015 HBM                                  | SC and FC in PD with FOG                                     | 23 PD-FOG, 35 HC                      | ON          | 9.8 min.         | N      | N                              | no, including lack of any nuisance regression                                                                                                                                                                                    | within                               | Y (5)          | N               | N            | ICA, dual-regression, 5 networks (SM, DMN, VIS, VAN, FP)                                                                           | dec. FC widespread within SM, and focally within DMN and visual                                                                                       | none found                                                                                                                 |                                                                                                                 |
| 7  | Gorges 2015 Neurobio of Aging                  | FC in PD based on cognitive impairment                       | 31 PD, 22 HC (PD: C=17, CU=14)        | ON          | 7.2 min.         | N      | N                              | no, including lack of any nuisance regression                                                                                                                                                                                    | within                               | Y (6)          | Y-BG/Thal combo | Y            | seeds (DMN, L FP, R FP, VIS, DAN, VAN, BG/Thal, brainstem, cerebellum) ^                                                           | dec. DMN, SM, DAN in cognitively impaired                                                                                                             | inc. FC within DMN, L FP, R FP, VAN, SM, brainstem, BG-Thal (PD-unimpaired)                                                | differences also based on cognitive impairment status                                                           |
| 8  | Madhyastha 2015 Brain                          | Dynamics in PD; CSF correlates                               | 24 PD, 21 HC                          | ON          | 24 min.          | N      | N                              | no filtering, don't do anything about motion (deny importance)                                                                                                                                                                   | between (both for dynamics)          | Y (23)         | Y               | Y            | 23 ICA networks (static FC analysis)                                                                                               | nothing survives multiple comparison correction with standard comparisons                                                                             | nothing survives multiple comparison correction                                                                            | differences also with dynamics analysis, here focused on stationary results                                     |
| 9  | Onu 2015 Neuroradiology                        | PD vs. HC FC differences                                     | 27 PD, 16 HC                          | OFF 10 hrs  | 16 min.          | N      | N                              | remove ICs associated with motion or nuisance factors; no correlation of motion with specific ICs                                                                                                                                | both                                 | Y (23)         | Y               | Y            | ICA (23 networks)                                                                                                                  | dec. within DMN, btwn visual-DMN, visual-DAN                                                                                                          | inc within DMN, FP, OFC, visual, auditory, and cerebellum; inc. between SM-FP/DAN                                          |                                                                                                                 |
| 10 | Putcha 2015 Neuroimage Clin                    | PD vs. HC FC differences in cognitive networks               | 24 PD, 20 HC                          | ON          | 6.5 min.         | N      | N                              | 2 PD, 4 HC excluded for large movements (>2mm disp.), remove ICs associated with motion; report motion did not differ between groups                                                                                             | between                              | Y (3)          | BG only         | N            | ICA (DMN, Sal, FP, striatum) ^                                                                                                     | dec. salience-R FP                                                                                                                                    | inc. DMN-R FP                                                                                                              |                                                                                                                 |
| 11 | Tan 2015 Front Hum Neurosci                    | pain processing in PD                                        | 14 PD, 17 HC                          | OFF, naive  | 13.3 min.        | N      | N                              | < 1.5 mm displacement, < 1.0 deg rotation, none excluded                                                                                                                                                                         | both                                 | Y (4)          | Y               | Y            | ICA (Salience, SM, DMN, FP, BG/Thal, Cerebellum)                                                                                   | dec. within Salience, SM, and BG, between Salience-BG/Thal                                                                                            | none reported                                                                                                              | BG network overlaps insula and salience overlaps putamen; some changes were state dependent                     |
| 12 | Vervoort 2016 Parkinsonism & Related Disorders | FC and motor deterioration in PD subtypes                    | 49 PD, 18 HC (PD: 33 PIGD, 16 TD)     | OFF         | 7.25 min.        | N      | Y - lenient*; FD>.5mm          | report FD>0.5mm or 5% signal change (unclear if DVARs or FD); excluded subjects with >50% scrubbing (N not reported); groups not significantly different on "FD"                                                                 | both                                 | Y              | Y               | N            | Craddock for whole brain (focus here, also look in detail at BG, motor, FP)                                                        | dec. in brain-wide FC, especially (PIGD) within BG, BG-SM, within Thal, and (TD) thal-SM                                                              | few inc., especially (both) brainstem-SM, and (TD) DAN-SM                                                                  | Also do a specific analysis on FP/SM/BG FC (not examined here); Some differences between subgroups              |
| 13 | Guimaraes 2017 Front Neurol                    | SC and FC differences in PD                                  | 48 PD, 33 HC                          | ON          | 6 min.           | N      | Y - FD > 0.2mm                 | excluded subjects with excessive motion (not defined, N not reported)                                                                                                                                                            | within                               | Y (70)         | Y               | Y            | BASC clusters^                                                                                                                     | dec. FC within visual, SM, DMN, cerebellum                                                                                                            | none reported                                                                                                              |                                                                                                                 |
| 14 | Imperiale 2017 Mol Psychiatry                  | SC and FC with impulsive-compulsive symptoms                 | 85 PD; 50 HC (PD: ICB=35, nICB=50)    | ON          | 12 min.          | N      | N                              | motion-contaminated ICA component removal using ICA-AROMA                                                                                                                                                                        | both                                 | Y (5)          | N               | N            | ICA (focus on DMN, Vis, SM, L FP, R FP) ^                                                                                          | none reported                                                                                                                                         | inc. within visual (and within SM in no-ICB)                                                                               | no significant between network effects                                                                          |
| 15 | Ma 2017 Brain Imaging Behav                    | determine modular differences in PD                          | 32 PD, 31 HC                          | OFF - 24hrs | 6.2 min.         | N      | N                              | excluded 3 PD due to very large motion (>2mm translation; 2 degree rotation); included max motion, RMS, and mean FD as covariates                                                                                                | between (and graph measures)         | Y              | Y               | Y            | randomly divide brain into 1,024 equal nodes                                                                                       | dec. SM-DMN, Salience-DMN, Visual-DMN                                                                                                                 | none reported                                                                                                              | Primarily focus on graph theory measures, not discussed here                                                    |
| 16 | Ma 2017 Eur Neurol                             | FC topography based on motor subtypes                        | 31 PD, 22 HC (PD: 12 TD, 19 PIGD)     | OFF - 12hrs | 8 min.           | Y      | N                              | exclude subjects with large movements (> 3mm or 3 deg; N not reported)                                                                                                                                                           | both - not separately reported       | Y              | Y               | Y            | whole-brain, voxel wise                                                                                                            | dec. widespread, especially in SM, visual, CO, BG, cerebellar, and DAN (PIGD only)                                                                    | none reported                                                                                                              |                                                                                                                 |
| 17 | Peraza 2017 HBM                                | inter- and intra- FC changes in PD with cognitive impairment | 99 PD, 30 HC (PD: 37 MCI, 62 NI)      | ON          | 6.4 min.         | N      | N                              | removed subjects with large (2mm, 1 degree) movements, report significant differences in movement                                                                                                                                | both                                 | Y (26)         | Y               | Y            | 26 nets from ICA                                                                                                                   | dec. within systems generally, especially small sites in (both groups) DAN and (nMCI) FP and SM, (MCI) Visual, Temporal                               | few inc. within, mainly in subcallosal FP; significant inc. between BG-SM (nMCI, same direction for MCI)                   | some decreases were inc. in anticorrelations (some in FP, DAN, Vis); some changes related to clinical variables |
| 18 | Wei 2017 Sci Rep                               | intra/inter network differences in PD depression             | 55 PD, 34 HC (PD: 20 dep, 35 non-dep) | ON          | 4.67 min.        | N      | N                              | exclude subjects with large movements >2.5mm trans. or 2.5 deg rot. (N=6) and micro-movements (mean FD>0.3mm, N=20)                                                                                                              | both                                 | Y (5)          | Y-BG/Thal combo | N            | ICA, selected BG/Thal, DMN, L FP, R FP, Salience                                                                                   | dec. within BG/Thal                                                                                                                                   | inc. FC between DMN-LFP (both), DMN-RFP (non-dep), DMN-BG-thal (non-dep)                                                   | also some differences between depressed and non depressed groups                                                |
| ** | Gratton et al - CURRENT SUBMISSION             | Connectome-wide differences between PD and HC                | 107 PD, 46 HC                         | OFF         | 7-22 min.        | Y      | Y - DVARs > 0.3%               | runs excluded if <50 low motion frames remained or had >1 mm. RMS motion; subjects excluded if <150 (5.5 min.) low motion frames or mean FD>0.5mm. (19 PD, 5 HC); examine FD-FC relationship post clean up (Circic et al., 2017) | both                                 | Y (12)         | Y (4)           | Y            | 285 regions, 17 nets: Gordon [Cortex], Freesurfer [BG&MTL], SUIIT [Cereb], and RSFC [Thal], all masked by Freesurfer gray-matter ^ | dec. FC within and between sensorimotor (SM, auditory, visual); dec. FC within and between thalamus, and cerebellum; some dec. between SM-Association | inc. FC between SM-thalamus, SM-cerebellum, and SM-association (pattern extends to a lesser degree to visual and auditory) | most FC differences represent decreases in magnitude (toward 0). FC differences replicate in split-half samples |

**Supplemental Table 1** (continued from previous page):

This table reviews previous results on functional connectivity differences in Parkinson's disease. To be most comparable to our manuscript, references were included in this review if they (1) included a comparison of PD vs. HC static functional connectivity, (2) had a multi-network scope (i.e., > 4 networks), (3) included PD cases without dementia (given our focus on non-demented PD), (4) reported on functional connectivity results, not focusing exclusively on graph metrics or feature weights from classifications. References were found based on literature searches, including a formal PubMed search with terms: Parkinson AND "functional connectivity" AND fMRI AND ("resting-state" OR "resting state") AND ("networks" OR "systems"). Gray rows represent papers that focused on the differences between PD and HC such as ours, rather than on differences between subtypes of PD. Additional notes: \* *motion censoring criteria are lenient as defined by* (Power et al., 2014); ^ *these references include some report or account of atrophy effects in PD.*

Table References:

(Amboni et al., 2015; Baggio et al., 2014; Baggio et al., 2015; Campbell et al., 2015; Canu et al., 2015; Gorges et al., 2015; Guimaraes et al., 2016; Imperiale et al., 2017; Ma et al., 2017a; Ma et al., 2017b; Madhyastha et al., 2015; Olde Dubbelink et al., 2014; Onu et al., 2015; Peraza et al., 2017; Putcha et al., 2015; Tan et al., 2015; Vervoort et al., 2016; Wei et al., 2017)

|                            | PD               | HC               | PD vs. HC      |
|----------------------------|------------------|------------------|----------------|
| <b>Behavioral Measures</b> | <b>Mean (SD)</b> | <b>Mean (SD)</b> | <b>p-value</b> |
| Attention                  | 0.30 (0.84)      | 0.65 (0.65)      | <b>0.01</b>    |
| Memory                     | 0.41 (0.74)      | 0.83 (0.59)      | <b>0.02</b>    |
| Language                   | 0.82 (0.96)      | 1.09 (0.86)      | 0.1            |
| Visuospatial               | 0.60 (0.66)      | 0.79 (0.62)      | 0.1            |
| Executive Function         | 0.24 (0.88)      | 0.59 (0.68)      | <b>0.02</b>    |
| Global Cognition           | 0.47 (0.59)      | 0.78 (0.44)      | <b>0.002</b>   |

**Supplemental Table 2: Cognitive Assessment.** PD and HC z-scores on cognitive measures related to attention, memory, language, visuospatial, and executive function, along with a summary measure of cognitive performance (“global cognition”). Sample means and standard deviations (SD) are reported, as well as the p-value of the comparison between groups. The attention, memory, and executive function z-scores were missing data from one participant, and the language function z-score was missing for two participants.

## Supplemental Figures

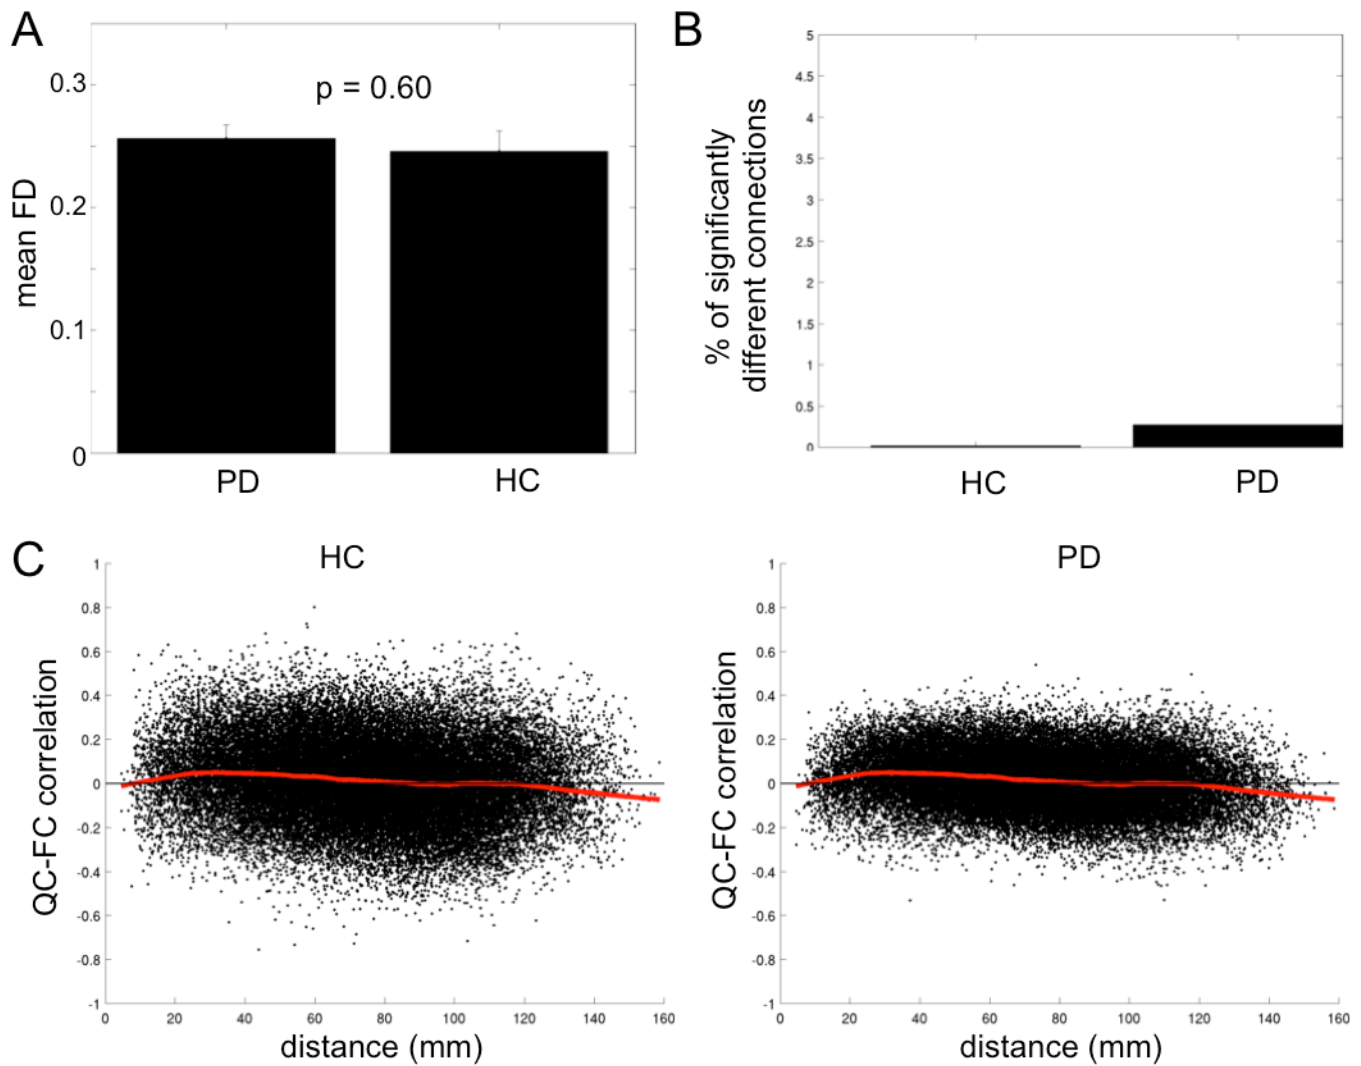

**Supplemental Figure 1. Motion effects in PD and HC groups.** (A) Mean Framewise Displacement (FD; see Supplemental Methods for calculation) in each group did not differ significantly ( $p=0.63$ ). (B) Percent of connections significantly related to FD in PD and HCs. Both had less the 0.5% of connections related to motion. (C) Relationship between distance and FD-FC correlation – note the fairly flat line, with similar pattern across the two groups.

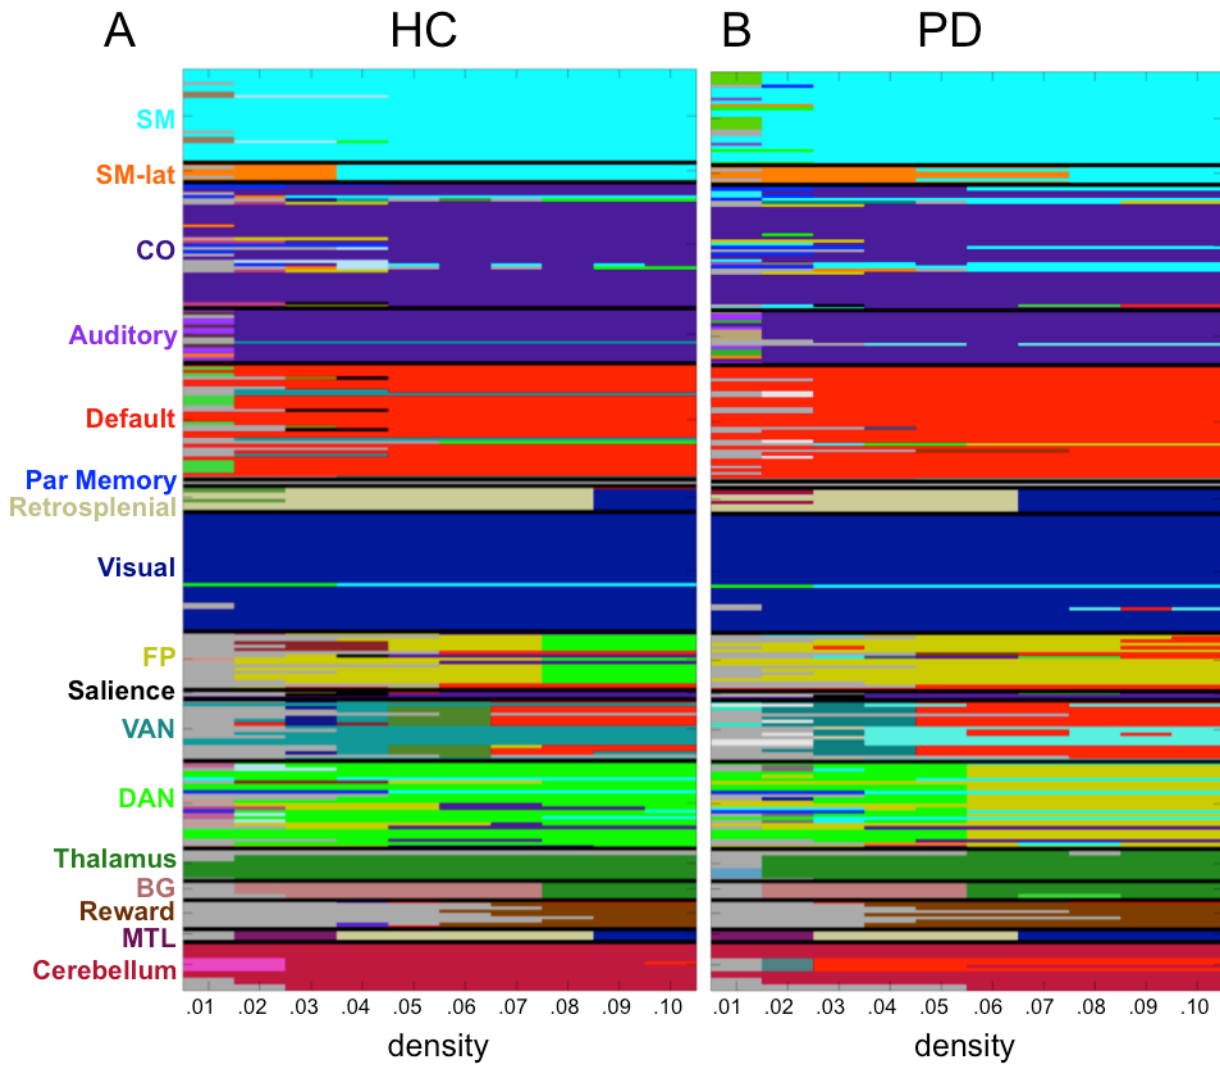

**Supplemental Figure 2: Infomap in PD and HC participants.** (A) Data-driven clustering solutions (using Infomap (Rosvall and Bergstrom, 2008)) for large-scale networks in this group of HC participants. Different colors represent different networks, shown for 0.01 – 0.1 density thresholds. Gray colors represent a lack of assignment. (B) The same plot, but for PD participants. Note substantial similarity between PD and HC participants.

PD – HC, G\* difference matrix  
300 spherical ROIs

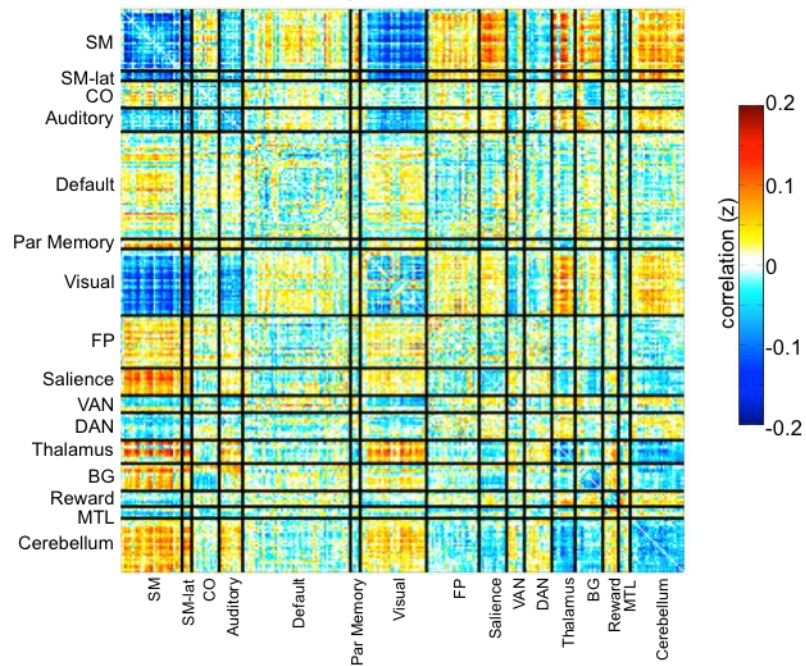

**Supplemental Figure 3:** PD – HC FC difference matrix for 300 spherical ROIs from (Power et al., 2011; Seitzman et al., 2017 *SFN abstract*). PD and HC exhibited significantly different matrices with this parcellation as well ( $p < 0.001$ ). Note the similarity of these results to the results reported in **Figure 2D** in the manuscript, with prominent differences within and between sensorimotor, thalamic, and cerebellar systems.

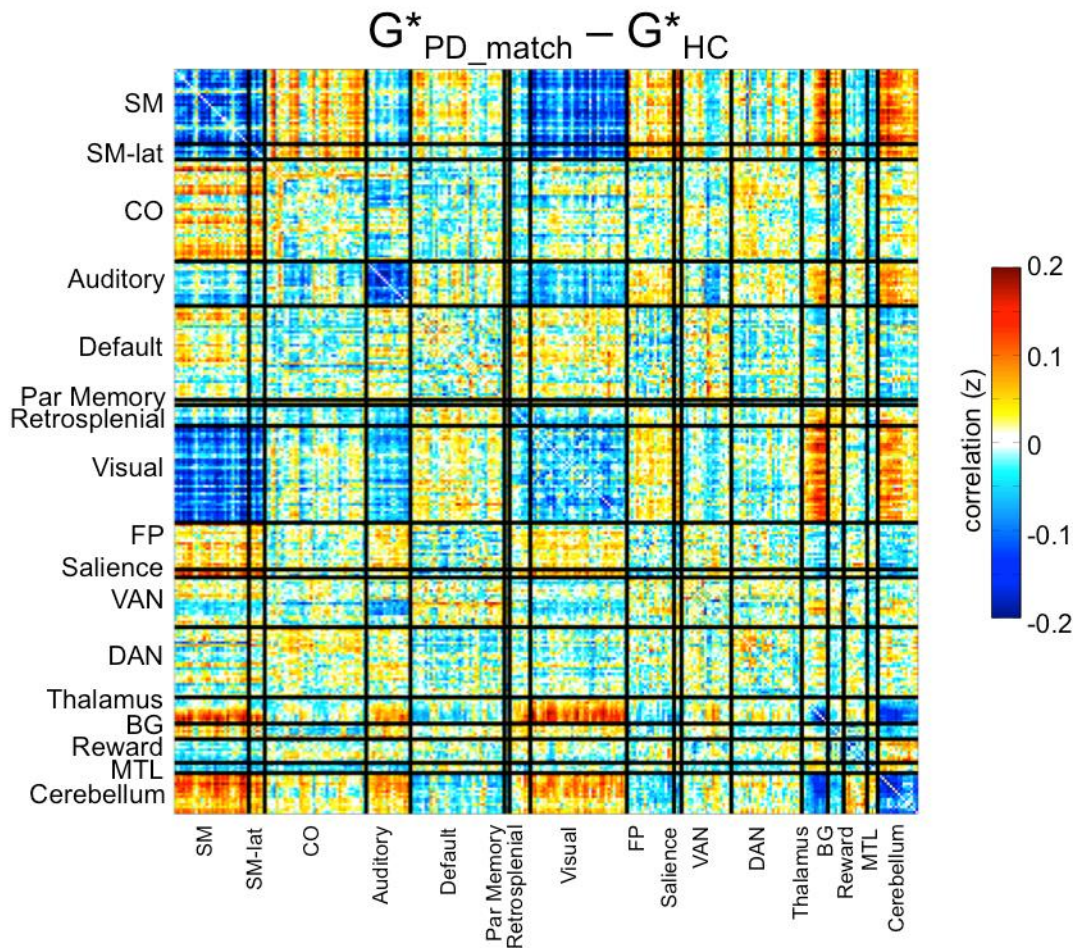

| Clinical Characteristics | PD_match   | HC          | PD_match vs. HC |
|--------------------------|------------|-------------|-----------------|
|                          | Mean (SD)  | Mean (SD)   | p-value         |
| <b>N</b>                 | 47         | 46          | -               |
| Sex (% male)             | 27.7       | 30.4        | 0.77            |
| Age                      | 65.3 (7.7) | 63.8 (11.0) | 0.45            |
| Years of Education       | 14.9 (2.0) | 14.8 (2.7)  | 0.82            |

**Supplemental Figure 4: PD and HC matched groups for subject number, sex, age, and years of education.** The PD group was subsampled to approximately match the HC group for sex, years of education, and participant numbers (note that age was already approximately matched; see table above). The figure shows the  $G^*$  difference map between groups ( $G^*_{PD\_match} - G^*_{HC}$ ;  $p < 0.001$ ). Notably, the differences between the two groups were quite similar to those reported for the full sample of PD.



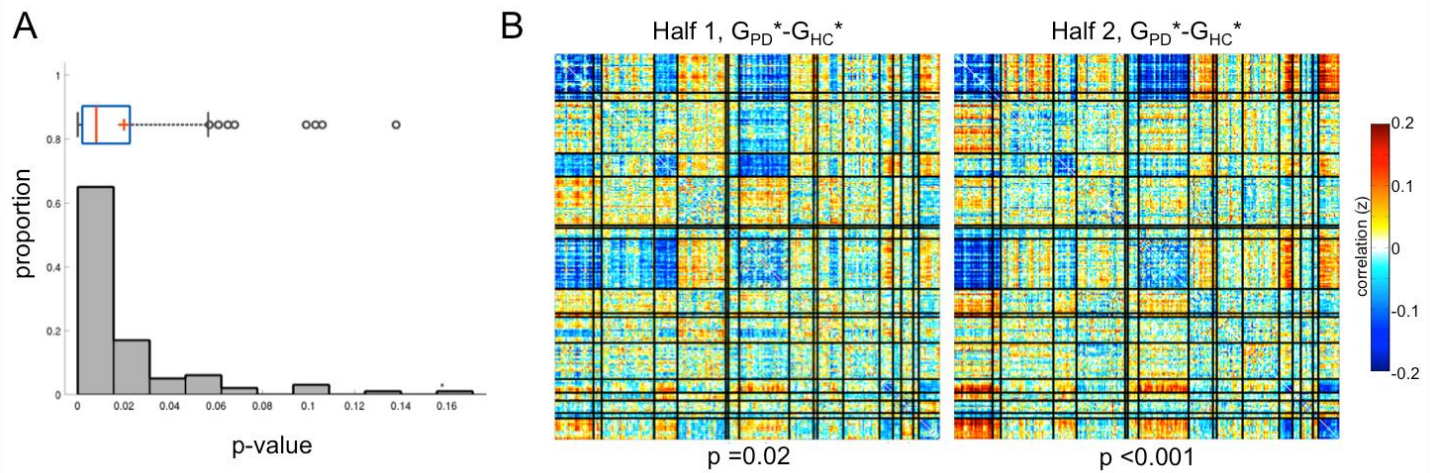

**Supplemental Figure 5: Consistency of findings across split-half samples of data.** (A) Distribution of p-values from OODA run on 50 split-half samples of PD and HC data (mean $\pm$ SD:  $p=0.02 \pm 0.03$ ; median:  $p=0.008$ ). (B)  $G^*$  difference matrices from the two halves of a split-half sampling are plotted (this iteration was selected as it had the median p-value outcome of split-half samples).  $G^*$  difference matrices were largely similar between the two halves, and were both significant ( $p < 0.05$ ).

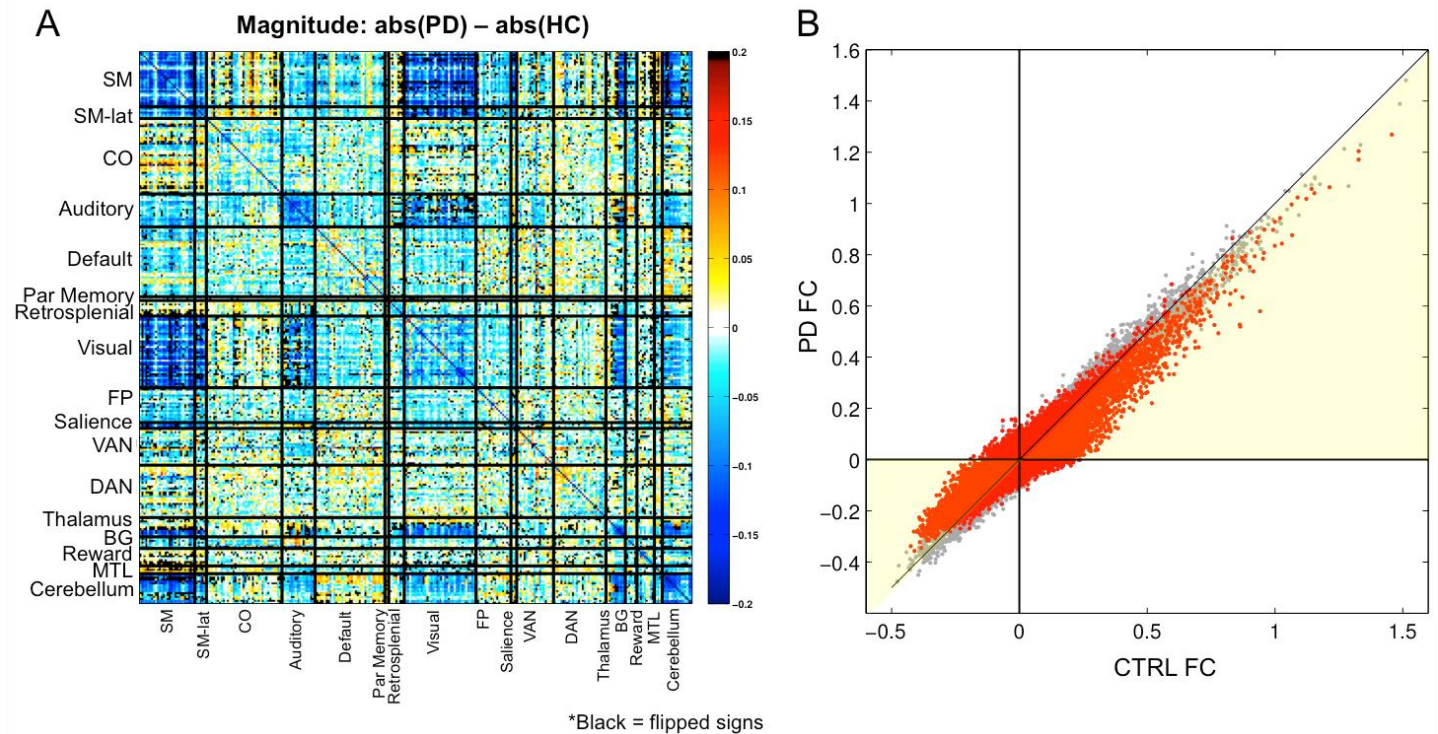

**Supplemental Figure 6: Analysis of FC differences between PD and HC.** (A) The absolute magnitude of differences between PD and controls; decreases in magnitude are shown in blue colors, increases in magnitude are shown in red colors, and changes in direction are shown in black. (B) FC for each connection in the correlation matrix for HC and PD participants, plotted against the unity line. Note that PD is associated with a flattening of FC, with negative values being elevated toward 0 and positive values being diminished toward 0, and thus tending to appear more in the yellow triangles. This was especially true of edges within the significant blocks (red) relative to other edges (gray) which stayed closer to the unity line.

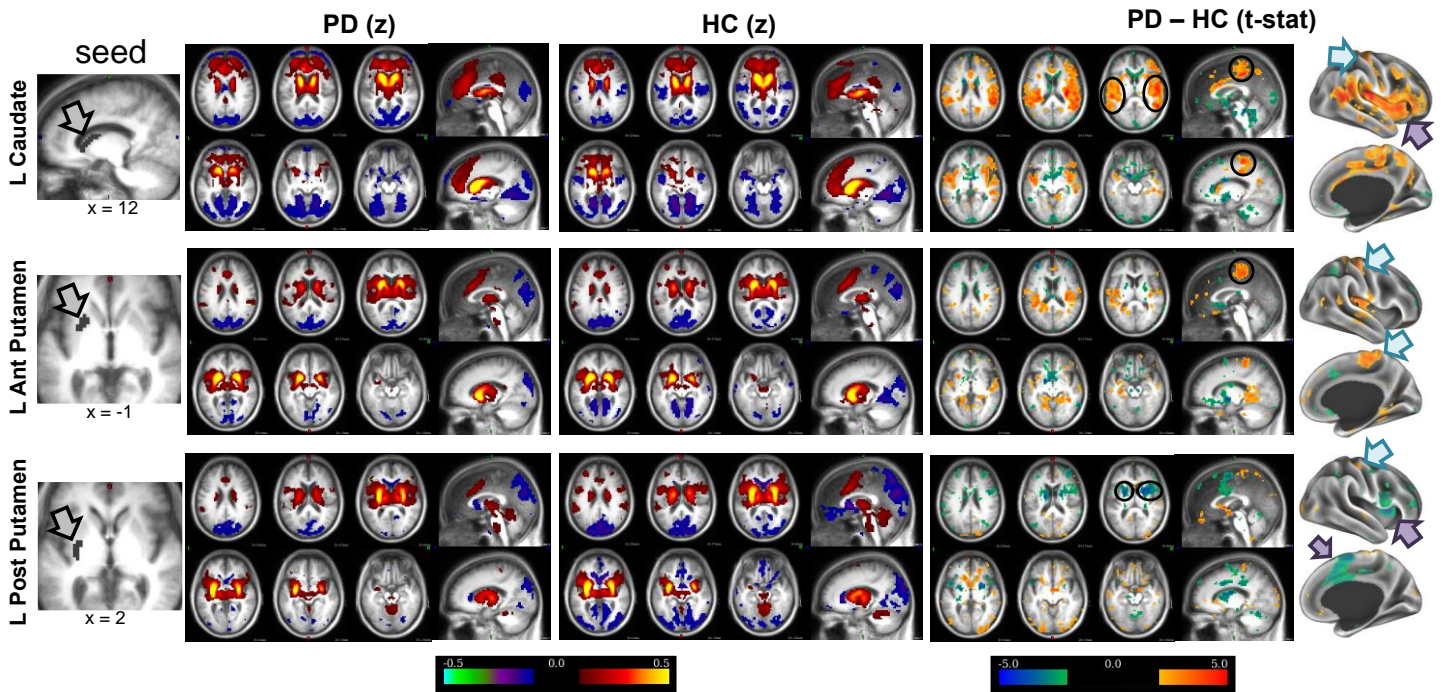

**Supplemental Figure 7: Striatal seed.** FC correlation maps for the left caudate (top panel), left anterior putamen (middle panel), and left posterior putamen (bottom panel) seeds (seeds shown on the far left, indicated with gray arrows), depicted for PD participants (left column), HC participants (middle column), and the difference between the two (right column, depicted in a t-statistic map in the volume and on the surface). Note the similarity between these results and other previous investigations of altered striatal connectivity in PD (Campbell et al., 2015; Hacker et al., 2012). Black circles in the t-statistic map indicate significant clusters ( $p < 0.05$ , permutation based FWE correction,  $t > 3.0$ ). Cyan arrows highlight motor increases with PD for each seed; purple arrows highlight prominent insular and dorsal anterior cingulate (CO/Saliency) differences; additional differences were present in cerebellar and visual regions that did not pass cluster correction at this threshold. FC patterns were analogous for right hemisphere seeds.

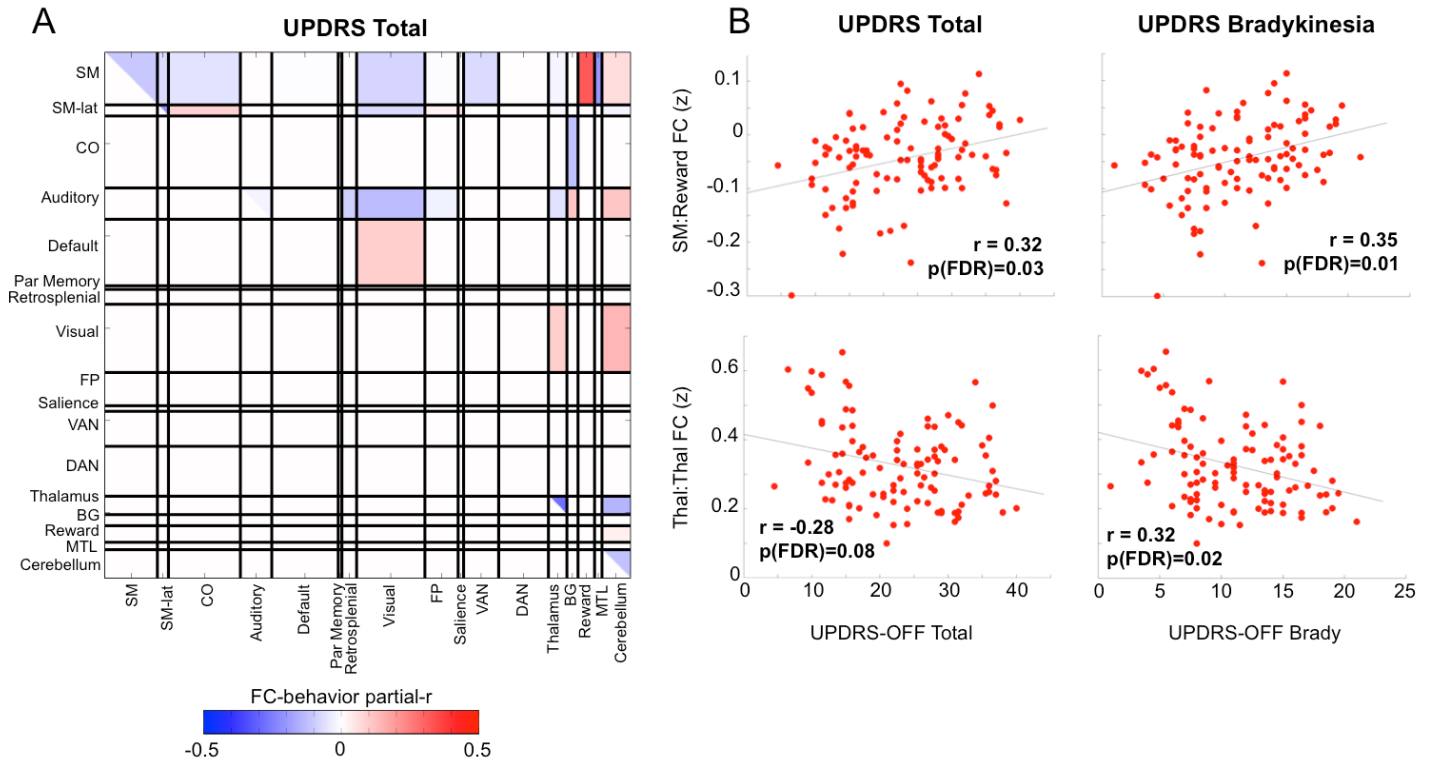

**Supplemental Figure 8: Relationship between block-FC and motor performance.** (A) Full set of relationships between UPDRS-III total (off medication) scores and FC within each permutation-selected block, with covariates for age, sex, and years of education. Note that most cortical and subcortical motor regions show a negative relationship between UPDRS-III score and FC, with the exceptions of SM-Reward and SM-cerebellar FC. Some weak positive relationships between UPDRS-III and FC were also seen for relationships with sensory systems. (B) Scatter plots showing significant correlations (FDR-corrected across blocks,  $p < 0.05$ ) for UPDRS-III total, and related significant correlations for the bradykinesia subscale (note that the within-thalamus effect was marginally significant for UPDRS-III total, at  $p(\text{FDR}) = 0.08$ ).

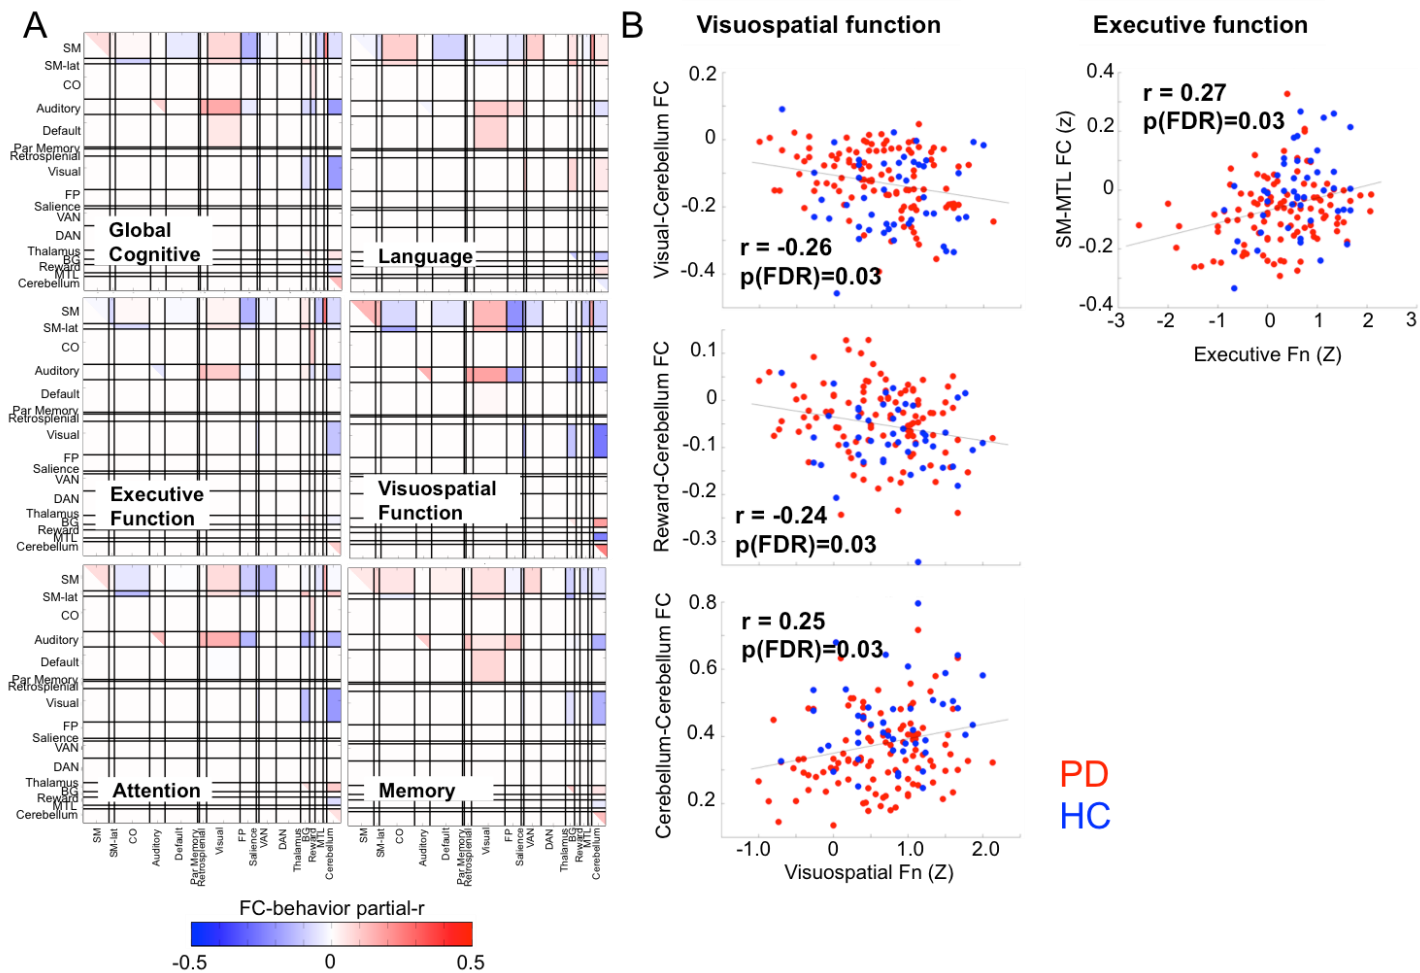

**Supplemental Figure 9: Relationship between block-FC and cognitive performance.** (A) Full set of relationships between cognitive scores and FC within each permutation-selected block, with covariates for age, sex, and years of education. Note that relationships showed heterogeneous patterns, differing by cognitive test and block. (B) Scatter plots showing significant correlations (FDR-corrected across blocks,  $p < 0.05$ ). PD participants shown in red; HC participants shown in blue.

## References

- Amboni, M., Tessitore, A., Esposito, F., Santangelo, G., Picillo, M., Vitale, C., Giordano, A., Erro, R., de Micco, R., Corbo, D., *et al.* (2015). Resting-state functional connectivity associated with mild cognitive impairment in Parkinson's disease. *J Neurol* 262, 425-434.
- Baggio, H.C., Sala-Llonch, R., Segura, B., Marti, M.J., Valldeoriola, F., Compta, Y., Tolosa, E., and Junque, C. (2014). Functional brain networks and cognitive deficits in Parkinson's disease. *Human brain mapping* 35, 4620-4634.
- Baggio, H.C., Segura, B., Sala-Llonch, R., Marti, M.J., Valldeoriola, F., Compta, Y., Tolosa, E., and Junque, C. (2015). Cognitive impairment and resting-state network connectivity in Parkinson's disease. *Human brain mapping* 36, 199-212.
- Buckner, R.L., Head, D., Parker, J., Fotenos, A.F., Marcus, D., Morris, J.C., and Snyder, A.Z. (2004). A unified approach for morphometric and functional data analysis in young, old, and demented adults using automated atlas-based head size normalization: reliability and validation against manual measurement of total intracranial volume. *NeuroImage* 23, 724-738.
- Campbell, M.C., Koller, J.M., Snyder, A.Z., Buddhala, C., Kotzbauer, P.T., and Perlmutter, J.S. (2015). CSF proteins and resting-state functional connectivity in Parkinson disease. *Neurology* 84, 2413-2421.
- Canu, E., Agosta, F., Sarasso, E., Volonte, M.A., Basaia, S., Stojkovic, T., Stefanova, E., Comi, G., Falini, A., Kostic, V.S., *et al.* (2015). Brain structural and functional connectivity in Parkinson's disease with freezing of gait. *Human brain mapping* 36, 5064-5078.
- Cools, R. (2006). Dopaminergic modulation of cognitive function-implications for L-DOPA treatment in Parkinson's disease. *NeurosciBiobehavRev* 30, 1-23.
- Delis, D., Kaplan, E., Kramer, J., and Ober, B. (2000). California Verbal Learning Test-II (San Antonio, TX: The Psychological Corporation).
- Delis, D.C., Kaplan, E., and Kramer, J.H. (2001). Delis Kaplan Executive Function System (The Psychological Corporation).
- Fahn, S., Elton, R.L., and Committee, M.o.t.U.D. (1987). Unified Parkinson's disease rating scale. In *Recent developments in Parkinson's disease*, S. Fahn, C.D. Marsden, M. Goldstein, and D.B. Calne, eds. (New York: Macmillan), pp. 153-163.
- Fox, M.D., Snyder, A.Z., Vincent, J.L., Corbetta, M., Van Essen, D.C., and Raichle, M.E. (2005). The human brain is intrinsically organized into dynamic, anticorrelated functional networks. *Proc Natl Acad Sci U S A* 102, 9673-9678.
- Gorges, M., Muller, H.P., Lule, D., Consortium, L., Pinkhardt, E.H., Ludolph, A.C., and Kassubek, J. (2015). To rise and to fall: functional connectivity in cognitively normal and cognitively impaired patients with Parkinson's disease. *Neurobiology of aging* 36, 1727-1735.
- Guimaraes, R.P., Arci Santos, M.C., Dagher, A., Campos, L.S., Azevedo, P., Piovesana, L.G., De Campos, B.M., Larcher, K., Zeighami, Y., Scarparo Amato-Filho, A.C., *et al.* (2016). Pattern of Reduced Functional Connectivity and Structural Abnormalities in Parkinson's Disease: An Exploratory Study. *Front Neurol* 7, 243.
- Hacker, C.D., Perlmutter, J.S., Criswell, S.R., Ances, B.M., and Snyder, A.Z. (2012). Resting state functional connectivity of the striatum in Parkinson's disease. *Brain* 135, 3699-3711.
- Hooper, H.E. (1983). Hooper Visual Organization Test (VOT) (Los Angeles, CA: Western Psychological Services).
- Hughes, A.J., Daniel, S.E., Kilford, L., and Lees, A.J. (1992). Accuracy of clinical diagnosis of idiopathic Parkinson's disease: a clinico-pathological study of 100 cases. *Journal of Neurology, Neurosurgery, and Psychiatry* 55, 181-184.
- Imperiale, F., Agosta, F., Canu, E., Markovic, V., Inuggi, A., Jecmenica-Lukic, M., Tomic, A., Copetti, M., Basaia, S., Kostic, V.S., and Filippi, M. (2017). Brain structural and functional signatures of impulsive-compulsive behaviours in Parkinson's disease. *Mol Psychiatry*.
- Ivnik, R.J., Malec, J.F., Smith, G.E., Tangalos, E.G., and Petersen, R.C. (1996). Neuropsychological tests' norms above age 55: COWAT, BNT, MAE token, WRAT-R reading, AMNART, STROOP, TMT, and JLO. *Clinical Neuropsychologist* 10, 262-278.
- Kaplan, E., Goodglass, H., and Weintraub, S. (2001). Boston Naming Test 2nd Edition (Austin, TX: Pro-ED).
- Lezak, M.D. (1995). *Neuropsychological Assessment*, 3 edn (Oxford: Oxford University Press).
- Lezak, M.D. (2004). *Neuropsychological assessment*. 4th, xiv, 1016.
- Ma, L.Y., Chen, X.D., He, Y., Ma, H.Z., and Feng, T. (2017a). Disrupted Brain Network Hubs in Subtype-Specific Parkinson's Disease. *Eur Neurol* 78, 200-209.
- Ma, Q., Huang, B., Wang, J., Seger, C., Yang, W., Li, C., Wang, J., Feng, J., Weng, L., Jiang, W., and Huang, R. (2017b). Altered modular organization of intrinsic brain functional networks in patients with Parkinson's disease. *Brain Imaging Behav* 11, 430-443.
- Madhyastha, T.M., Askren, M.K., Zhang, J., Leverenz, J.B., Montine, T.J., and Grabowski, T.J. (2015). Group comparison of spatiotemporal dynamics of intrinsic networks in Parkinson's disease. *Brain* 138, 2672-2686.
- Mintun, M.A., LaRossa, G.N., Sheline, Y.I., Dence, C.S., Lee, S.Y., Mach, R.H., Klunk, W.E., Mathis, C.A., DeKosky, S.T., and Morris, J.C. (2006). [11C]PIB in a nondemented population: potential antecedent marker of Alzheimer disease. *Neurology* 67, 446-452.
- Morris, J.C. (1993). The Clinical Dementia Rating (CDR): current version and scoring rules. *Neurology* 43, 2412-2414.

Olde Dubbelink, K.T., Schoonheim, M.M., Deijen, J.B., Twisk, J.W., Barkhof, F., and Berendse, H.W. (2014). Functional connectivity and cognitive decline over 3 years in Parkinson disease. *Neurology* 83, 2046-2053.

Onu, M., Badea, L., Roceanu, A., Tivarus, M., and Bajenaru, O. (2015). Increased connectivity between sensorimotor and attentional areas in Parkinson's disease. *Neuroradiology* 57, 957-968.

Peraza, L.R., Nesbitt, D., Lawson, R.A., Duncan, G.W., Yarnall, A.J., Khoo, T.K., Kaiser, M., Firbank, M.J., O'Brien, J.T., Barker, R.A., *et al.* (2017). Intra- and inter-network functional alterations in Parkinson's disease with mild cognitive impairment. *Human brain mapping* 38, 1702-1715.

Power, J.D., Cohen, A.L., Nelson, S.M., Wig, G.S., Barnes, K.A., Church, J.A., Vogel, A.C., Laumann, T.O., Miezin, F.M., Schlaggar, B.L., and Petersen, S.E. (2011). Functional network organization of the human brain. *Neuron* 72, 665-678.

Power, J.D., Mitra, A., Laumann, T.O., Snyder, A.Z., Schlaggar, B.L., and Petersen, S.E. (2014). Methods to detect, characterize, and remove motion artifact in resting state fMRI. *NeuroImage* 84, 320-341.

Putcha, D., Ross, R.S., Cronin-Golomb, A., Janes, A.C., and Stern, C.E. (2015). Altered intrinsic functional coupling between core neurocognitive networks in Parkinson's disease. *NeuroImage Clin* 7, 449-455.

Rosvall, M., and Bergstrom, C.T. (2008). Maps of random walks on complex networks reveal community structure. *Proc Natl Acad Sci U S A* 105, 1118-1123.

Seitzman, B.A., Gratton, C., Schlaggar, B.L., Petersen, S.E., and Greene, D.J. (2017 *SFN abstract*). An expanded set of regions of interest for functional network analysis: improved representation of the subcortex and cerebellum. In Society for Neuroscience (Washington D.C.).

Sperling, R.A., Aisen, P.S., Beckett, L.A., Bennett, D.A., Craft, S., Fagan, A.M., Iwatsubo, T., Jack, C.R., Jr., Kaye, J., Montine, T.J., *et al.* (2011). Toward defining the preclinical stages of Alzheimer's disease: recommendations from the National Institute on Aging-Alzheimer's Association workgroups on diagnostic guidelines for Alzheimer's disease. *AlzheimersDement* 7, 280-292.

Tan, Y., Tan, J., Deng, J., Cui, W., He, H., Yang, F., Deng, H., Xiao, R., Huang, Z., Zhang, X., *et al.* (2015). Alteration of Basal Ganglia and Right Frontoparietal Network in Early Drug-Naive Parkinson's Disease during Heat Pain Stimuli and Resting State. *Frontiers in human neuroscience* 9, 467.

Vervoort, G., Alaerts, K., Bengevoord, A., Nackaerts, E., Heremans, E., Vandenberghe, W., and Nieuwboer, A. (2016). Functional connectivity alterations in the motor and fronto-parietal network relate to behavioral heterogeneity in Parkinson's disease. *Parkinsonism & related disorders* 24, 48-55.

Wechsler, D. (1997a). Wechsler Adult Intelligence Scale - III (The Psychological Corporation).

Wechsler, D. (1997b). Wechsler Memory Scale III (San Antonio, TX: Psychological Corporation).

Wei, L., Hu, X., Zhu, Y., Yuan, Y., Liu, W., and Chen, H. (2017). Aberrant Intra- and Internetwork Functional Connectivity in Depressed Parkinson's Disease. *Sci Rep* 7, 2568.

Woodcock, R.W., McGrew, K.S., and Mather, N. (2001). *Woodcock-Johnson Tests of Achievement* (Itasca, IL: Riverside Publishing Company).
